# Supplementary material for: Genome‐wide DNA methylation analysis identifies potent CpG signature for temzolomide response in non‐G‐CIMP glioblastomas with unmethylated MGMT promoter: MGMT ‐dependent roles of GPR81
Source: PubMed Central journal article supplement (PMC11017469; doi:10.1111/cns.14465), 2023-10-13

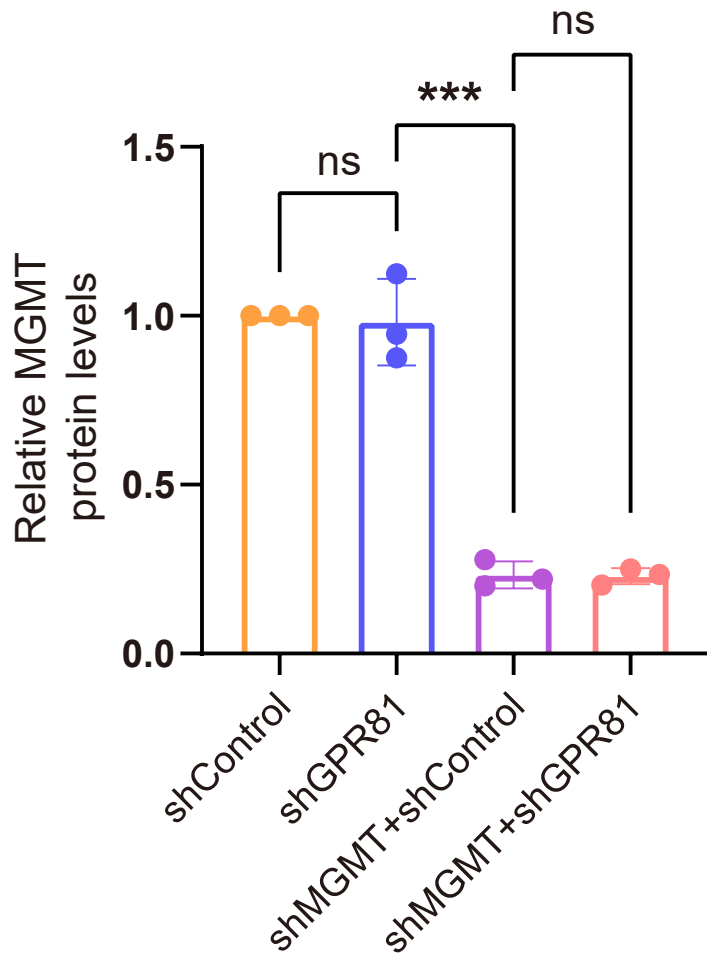

Supplement: CNS-30-e14465-s001.pdf [file CNS-30-e14465-s001.pdf]
